# Supplementary material for: Twelve-Months Follow-up of Supervised Exercise after Percutaneous Transluminal Angioplasty for Intermittent Claudication: A Randomised Clinical Trial
Source: Int J Environ Res Public Health. 2013 Nov 11;10(11):5998–6014. doi: 10.3390/ijerph10115998 (PMC3863883; doi:10.3390/ijerph10115998)
Supplement: Supplementary File 1 — Supplementary Information (PDF, 120 KB) [file ijerph-10-05998-s001.pdf]

**Table S1.** Observed baseline and follow-up measurements.

|                                       | Sample size | Mean value at baseline (95% CI) | Mean value at 3 months (95% CI) | Mean value at 6 months (95% CI) | Mean value at 12 months (95% CI) | Mean change: 12 months minus baseline (95% CI) |
|---------------------------------------|-------------|---------------------------------|---------------------------------|---------------------------------|----------------------------------|------------------------------------------------|
| <b>Physical function</b>              |             |                                 |                                 |                                 |                                  |                                                |
| <b>6 MWT (m)</b>                      |             |                                 |                                 |                                 |                                  |                                                |
| Intervention group                    | 28          | 412 (375.7–448.3)               | 492.4 (460.6–524.2)             | 502.1 (468.9–535.4)             | 513.7 (482.9–544.5)              | 96.8 (68–125.7)                                |
| Control group                         | 21          | 407.2 (362.5–453)               | 480.2 (445.1–515.2)             | 456.3 (406.8–505.8)             | 458.1 (407.8–508.3)              | 64.2 (20.1–108.4)                              |
| <b>MWD treadmill (m)</b>              |             |                                 |                                 |                                 |                                  |                                                |
| Intervention group                    | 26          | 398.6 (289.3–507.8)             | 657.5 (499.2–815.8)             | 831.8 (604.3–1059.3)            | 876 (654.9–1097.1)               | 429.5 (233.7–625.4)                            |
| Control group                         | 21          | 284.6 (191.5–377.6)             | 445.5 (330.8–560.1)             | 513.1 (368.7–657.5)             | 516.9 (324.5–709.4)              | 274.7 (116.6–432.9)                            |
| <b>PFWD treadmill (m)</b>             |             |                                 |                                 |                                 |                                  |                                                |
| Intervention group                    | 24          | 163.5 (113–214)                 | 480.2 (242.5–717.9)             | 698.4 (355.8–1041)              | 705.9 (475.8–936)                | 566.7 (344.3–789)                              |
| Control group                         | 20          | 137.3 (77.5–197.1)              | 250.6 (61–440.3)                | 476.9 (297.4–656.4)             | 460.9 (223.8–698)                | 402.3 (168.4–636.2)                            |
| <b>Limb hemodynamics</b>              |             |                                 |                                 |                                 |                                  |                                                |
| <b>Ankle Brachial Index (%)</b>       |             |                                 |                                 |                                 |                                  |                                                |
| Intervention group                    | 27          | 58.9 (53.2–64.6)                | 92 (85.7–98.2)                  | 93.3 (87.8–98.9)                | 91.9 (85.8–97.9)                 | 31.4 (23.8–39)                                 |
| Control group                         | 20          | 57.2 (50–64.3)                  | 89.6 (81.9–97.2)                | 87.3 (76.7–97.7)                | 84.9 (74.7–95)                   | 29.8 (20.4–39.2)                               |
| <b>Pulse Volume Registration (mm)</b> |             |                                 |                                 |                                 |                                  |                                                |
| Intervention group                    | 27          | 4.4 (3.5–5.4)                   | 9.7 (8.8–10.6)                  | 9.9 (8.7–11)                    | 10.1 (9–11.1)                    | 5.9 (4.7–7.2)                                  |
| Control group                         | 20          | 4.7 (3.5–5.8)                   | 8.6 (7–10.2)                    | 8.8 (7–10.7)                    | 9 (7.2–10.8)                     | 4.5 (3.3–5.8)                                  |
| <b>HRQoL</b>                          |             |                                 |                                 |                                 |                                  |                                                |
| <b>SF 36</b>                          |             |                                 |                                 |                                 |                                  |                                                |

Table S1. Cont.

|                                 | Sample size | Mean value at baseline (95% CI) | Mean value at 3 months (95% CI) | Mean value at 6 months (95% CI) | Mean value at 12 months (95% CI) | Mean change: 12 months minus baseline (95% CI) |
|---------------------------------|-------------|---------------------------------|---------------------------------|---------------------------------|----------------------------------|------------------------------------------------|
| <b>Physical component score</b> |             |                                 |                                 |                                 |                                  |                                                |
| Intervention group              | 25          | 51.7 (48.1–55.4)                | 50.7 (47.1–54.4)                | 53.1 (49.4–56.9)                | 53.1 (48.6–57.5)                 | −0.1 (−4.6–4.5)                                |
| Control group                   | 21          | 48.4 (44.5–52.4)                | 48.5 (44–49.2)                  | 46.6 (40.8–52.3)                | 48.5 (43.1–54)                   | 1.7 (−2.7–6.1)                                 |
| <b>Mental component score</b>   |             |                                 |                                 |                                 |                                  |                                                |
| Intervention group              | 25          | 50.3 (46.1–54.6)                | 49.2 (45.2–54.4)                | 51.3 (46.4–56.2)                | 48.2 (43.5–53)                   | −1 (−5.6–3.6)                                  |
| Control group                   | 21          | 51.5 (48.2–54.7)                | 50.4 (46.6–54.3)                | 49.8 (45.6–53.9)                | 51.5 (46–57)                     | −1.1 (−5.6–3.4)                                |
| <b>Physical function (PF)</b>   |             |                                 |                                 |                                 |                                  |                                                |
| Intervention group              | 29          | 50.3 (43.7–56.8)                | 73.5 (65.9–81.1)                | 84 (78.4–89.7)                  | 75.6 (66.1–85.2)                 | 25.4 (16.4–34.5)                               |
| Control group                   | 21          | 47.6 (41.8–53.5)                | 74.1 (65.6–82.6)                | 68.5 (56.1–80.9)                | 65.5 (52.9–78.1)                 | 19 (7.6–30.4)                                  |
| <b>Physical role (RP)</b>       |             |                                 |                                 |                                 |                                  |                                                |
| Intervention group              | 26          | 53.3 (42.6–64)                  | 72 (61.5–82.5)                  | 78.6 (67.1–90.1)                | 73.7 (60.5–86.9)                 | 20.9 (4.9–36.9)                                |
| Control group                   | 21          | 54.8 (44.2–65.3)                | 68.8 (56.6–81)                  | 72.8 (61.6–84)                  | 75.7 (62–89.5)                   | 23.5 (13.7–33.3)                               |
| <b>Bodily pain (BP)</b>         |             |                                 |                                 |                                 |                                  |                                                |
| Intervention group              | 28          | 41.7 (35.1–48.2)                | 67.9 (58.4–77.3)                | 75 (63.7–86.2)                  | 70.6 (59.5–81.6)                 | 24.9 (14.9–34.9)                               |
| Control group                   | 21          | 38.3 (31.2–45.4)                | 54.2 (42–66.4)                  | 58.9 (47.3–70.6)                | 63.8 (50.5–77.1)                 | 27.5 (14.5–40.6)                               |
| <b>General health (GH)</b>      |             |                                 |                                 |                                 |                                  |                                                |
| Intervention group              | 27          | 59.4 (51.5–67.3)                | 64.3 (55.9–72.7)                | 68.1 (59.6–76.7)                | 66.3 (55.6–76.9)                 | 8 (−1.4–17.3)                                  |
| Control group                   | 21          | 54 (43.4–64.7)                  | 61.1 (51–71.2)                  | 55.5 (42.3–68.6)                | 62.5 (47.4–77.6)                 | 10.7 (1.2–20.2)                                |
| <b>Vitality (VT)</b>            |             |                                 |                                 |                                 |                                  |                                                |
| Intervention group              | 27          | 48.5 (42.2–54.8)                | 59.1 (52.6–65.6)                | 63.1 (55.7–70.5)                | 59.1 (51.6–66.6)                 | 10.5 (3.5–17.4)                                |
| Control group                   | 21          | 46.2 (40.3–52.1)                | 55.5 (50.3–60.7)                | 50.8 (43.9–57.7)                | 55.9 (45.5–66.4)                 | 10.6 (2.9–18.3)                                |
| <b>Social function (SF)</b>     |             |                                 |                                 |                                 |                                  |                                                |
| Intervention group              | 29          | 75 (63.8–86.2)                  | 84.9 (76.3–93.6)                | 91.1 (80.7–101.4)               | 80.2 (68–92.5)                   | 6.8 (−5.2–18.7)                                |
| Control group                   | 21          | 76.2 (65.3–87.1)                | 85.1 (75.8–94.4)                | 86.8 (77.3–96.3)                | 85.3 (73.4–97.2)                 | 5.9 (−4.6–16.3)                                |

Table S1. Cont.

|                                       | Sample size | Mean value at baseline (95% CI) | Mean value at 3 months (95% CI) | Mean value at 6 months (95% CI) | Mean value at 12 months (95% CI) | Mean change: 12 months minus baseline (95% CI) |
|---------------------------------------|-------------|---------------------------------|---------------------------------|---------------------------------|----------------------------------|------------------------------------------------|
| <b>Emotional role (RE)</b>            |             |                                 |                                 |                                 |                                  |                                                |
| Intervention group                    | 28          | 58.1 (49.4–66.8)                | 66 (58.2–73.8)                  | 75.4 (70.5–80.3)                | 65.8 (56.7–75)                   | 7.8 (−1.9–17.6)                                |
| Control group                         | 21          | 58.4 (50.6–66.2)                | 66.4 (67.8–73.3)                | 69.8 (63–76.6)                  | 69.4 (59.1–79.7)                 | 10.2 (1.2–19.2)                                |
| <b>Mental health (MH)</b>             |             |                                 |                                 |                                 |                                  |                                                |
| Intervention group                    | 27          | 60.2 (53.3–67)                  | 64.3 (59.1–69.5)                | 65.7 (58.8–72.6)                | 61.5 (54–68.9)                   | 2.2 (−4.7–9)                                   |
| Control group                         | 21          | 65.9 (61–70.8)                  | 65.1 (65.1–68)                  | 62.8 (57.3–68.4)                | 64.9 (58–71.9)                   | −2.1 (−7–2.7)                                  |
| <b>CLAUS</b>                          |             |                                 |                                 |                                 |                                  |                                                |
| <b>Daily life (DL)</b>                |             |                                 |                                 |                                 |                                  |                                                |
| Intervention group                    | 28          | 66.9 (59–74.9)                  | 83.1 (75.1–91.1)                | 80.3 (69.5–91)                  | 83.3 (74.7–92)                   | 14.7 (7–22.3)                                  |
| Control group                         | 21          | 58.7 (850.1–67.4)               | 79 (71–87)                      | 75.3 (63.7–87)                  | 78.4 (68.3–88.5)                 | 22.6 (10.3–35)                                 |
| <b>Pain (P)</b>                       |             |                                 |                                 |                                 |                                  |                                                |
| Intervention group                    | 28          | 52.6 (46.1–59.2)                | 76.6 (68.9–84.3)                | 80.3 (71.4–89.3)                | 80.9 (73.3–88.5)                 | 26.1 (16.8–35.4)                               |
| Control group                         | 21          | 43.7 (35.7–51.7)                | 72.1 (61.9–82.3)                | 69.5 (55.8–82.9)                | 73 (59.8–86.1)                   | 29 (15.8–42.2)                                 |
| <b>Social life (SL)</b>               |             |                                 |                                 |                                 |                                  |                                                |
| Intervention group                    | 26          | 84.9 (76.9–92.8)                | 88.2 (77.7–98.8)                | 92.1 (83.4–100.7)               | 86.2 (75.6–96.8)                 | 1.7 (−6–9.4)                                   |
| Control group                         | 21          | 87.2 (78.6–95.8)                | 94.2 (89.5–98.8)                | 94.5 (89.6–99.4)                | 92.1 (84.6–99.5)                 | 4.6 (−1.5–10.6)                                |
| <b>Disease-specific anxiety (DSA)</b> |             |                                 |                                 |                                 |                                  |                                                |
| Intervention group                    | 26          | 82 (75–88.9)                    | 91 (85.7–96.3)                  | 92.3 (886.2–98.4)               | 88.8 (82.4–95.2)                 | 5.5 (1.1–9.9)                                  |
| Control group                         | 21          | 81.2 (71.3–91.1)                | 86.9 (79.1–94.7)                | 86.6 (79.2–94.1)                | 86.9 (77.4–96.4)                 | 5.8 (−8.4–20.1)                                |
| <b>Psychological well-being (PWB)</b> |             |                                 |                                 |                                 |                                  |                                                |
| Intervention group                    | 27          | 81.9 (74–89.8)                  | 87 (79–95)                      | 87.1 (77.5–96.6)                | 83.2 (73.5–92.8)                 | 2.7 (−4.1–9.5)                                 |
| Control group                         | 21          | 82.7 (76–89.3)                  | 89 (84.6–93.4)                  | 87.7 (80.8–94.6)                | 88 (78.3–97.7)                   | 3.4 (−2.3–9.1)                                 |
